# Supplementary material for: Tropheryma whipplei Endocarditis
Source: PubMed Central journal article supplement (PMC3837638; doi:10.3201/eid1911.121356), 2013-11
Supplement: 12-1356-Techapp-s1.pdf [file 12-1356-Techapp-s1.pdf]

# Tropheryma whipplei Endocarditis

## Technical Appendix

Technical Appendix Table 1. Classification of the patients with *Tropheryma whipplei* endocarditis according to the Duke criteria and with the inclusion of positive *T. whipplei* PCR analysis on blood specimens as a major criterion\*

| Patient (Ref)     | Major criteria |                  |                 | Minor criteria |                          |                    |                       | Current criteria | Duke         |                           |
|-------------------|----------------|------------------|-----------------|----------------|--------------------------|--------------------|-----------------------|------------------|--------------|---------------------------|
|                   | Blood culture  | Echocardiography | Cardiac history | Fever          | Microbiological evidence | Vascular phenomena | Immunologic phenomena |                  | Tw blood PCR | Modified according to PCR |
| <b>Our series</b> |                |                  |                 |                |                          |                    |                       |                  |              |                           |
| 1                 | A              | Pr               | A               | A              | A                        | Y                  | A                     | P                | Neg          | P                         |
| 2                 | A              | A                | A               | Pr             | A                        | A                  | A                     | R                | Neg          | R                         |
| 3                 | A              | Pr               | A               | Pr             | A                        | A                  | A                     | P                | Pos          | D                         |
| 4                 | A              | Pr               | Pr              | Pr             | A                        | Pr                 | A                     | D                | Neg          | D                         |
| 5                 | A              | Pr               | A               | Pr             | A                        | A                  | A                     | P                | -            | -                         |
| 6                 | A              | A                | A               | A              | A                        | A                  | A                     | R                | -            | -                         |
| 7                 | A              | Pr               | A               | A              | A                        | A                  | A                     | R                | Neg          | R                         |
| 8                 | A              | Pr               | A               | A              | A                        | Pr                 | A                     | P                | -            | -                         |
| 9                 | A              | Pr               | Pr              | A              | A                        | A                  | A                     | P                | -            | -                         |
| 10                | A              | Pr               | A               | A              | A                        | A                  | A                     | E                | -            | -                         |
| 11                | A              | Pr               | A               | A              | A                        | A                  | A                     | E                | -            | -                         |
| 12                | A              | Pr               | Pr              | Pr             | A                        | A                  | A                     | P                | Pos          | D                         |
| 13                | A              | Pr               | A               | A              | A                        | A                  | A                     | R                | -            | -                         |
| 14                | A              | A                | A               | Pr             | A                        | Pr                 | A                     | R                | Neg          | R                         |
| 15                | A              | Pr               | A               | Pr             | A                        | A                  | A                     | P                | Neg          | P                         |
| 16                | A              | Pr               | Pr              | Pr             | A                        | A                  | A                     | P                | Neg          | P                         |
| 17                | A              | Pr               | A               | Pr             | A                        | A                  | A                     | P                | Neg          | P                         |
| 18                | A              | Pr               | Pr              | Pr             | A                        | A                  | A                     | P                | Neg          | P                         |
| 19                | A              | A                | A               | Pr             | A                        | A                  | A                     | R                | Neg          | E                         |
| 20                | A              | A                | A               | A              | A                        | Pr                 | A                     | R                | Pos          | D                         |
| 21                | A              | Pr               | A               | A              | A                        | Pr                 | A                     | P                | Pos          | D                         |
| 22                | A              | Pr               | Pr              | A              | A                        | Pr                 | A                     | P                | -            | -                         |
| 23                | A              | Pr               | A               | A              | A                        | A                  | A                     | R                | -            | -                         |
| 24                | A              | Pr               | Pr              | A              | A                        | Pr                 | A                     | P                | Pos          | D                         |
| 25                | A              | Pr               | A               | A              | A                        | A                  | A                     | P                | Neg          | P                         |
| 26                | A              | Pr               | Pr              | A              | A                        | A                  | A                     | P                | -            | -                         |
| 27                | A              | Pr               | Pr              | A              | A                        | A                  | Pr                    | P                | -            | -                         |
| 28                | A              | Pr               | Pr              | A              | A                        | Pr                 | A                     | P                | -            | -                         |
| <b>Literature</b> |                |                  |                 |                |                          |                    |                       |                  |              |                           |
| 1 (1)             | A              | Pr               | Pr              | A              | A                        | Pr                 | A                     | P                | -            | -                         |
| 2 (1)             | A              | Pr               | Pr              | A              | A                        | Pr                 | A                     | P                | -            | -                         |
| 3 (1)             | A              | -                | -               | -              | A                        | -                  | -                     | *                | -            | -                         |
| 4 (1)             | A              | -                | -               | -              | A                        | -                  | -                     | *                | -            | -                         |
| 5 (1)             | A              | -                | -               | -              | A                        | -                  | -                     | *                | -            | -                         |
| 6 (1)             | A              | -                | -               | -              | A                        | -                  | -                     | *                | -            | -                         |
| 7 (1,2)           | A              | -                | -               | -              | A                        | -                  | -                     | *                | -            | -                         |
| 8 (1)             | A              | -                | -               | -              | A                        | -                  | -                     | *                | -            | -                         |
| 9 (1)             | A              | -                | -               | -              | A                        | -                  | -                     | *                | -            | -                         |
| 10 (1)            | A              | -                | -               | -              | A                        | -                  | -                     | *                | -            | -                         |
| 11 (1)            | A              | -                | -               | -              | A                        | -                  | -                     | *                | -            | -                         |
| 12 (1)            | A              | -                | -               | -              | A                        | -                  | -                     | *                | -            | -                         |
| 13 (1)            | A              | -                | -               | -              | A                        | -                  | -                     | *                | -            | -                         |
| 14 (1)            | A              | -                | -               | -              | A                        | -                  | -                     | *                | -            | -                         |
| 15 (3)            | A              | Pr               | A               | -              | A                        | Pr                 | A                     | P                | -            | -                         |
| 16 (4)            | A              | Pr               | A               | A              | A                        | A                  | A                     | R                | -            | -                         |
| 17 (5)            | A              | A                | Pr              | A              | A                        | A                  | A                     | R                | -            | -                         |
| 18 (6)            | A              | Pr               | Pr              | A              | A                        | A                  | A                     | P                | -            | -                         |
| 19 (6)            | A              | Pr               | Pr              | Pr             | A                        | A                  | A                     | P                | -            | -                         |
| 20 (6)            | A              | Pr               | A               | Pr             | A                        | A                  | A                     | P                | -            | -                         |
| 21 (7)            | A              | Pr               | A               | A              | A                        | Pr                 | A                     | P                | -            | -                         |

|         |    |    |    |    |    |    |    |        |     |    |
|---------|----|----|----|----|----|----|----|--------|-----|----|
| 22 (7)  | A  | Pr | A  | A  | A  | A  | A  | R      | -   | -  |
| 23 (7)  | A  | Pr | A  | A  | A  | A  | A  | R      | -   | -  |
| 24 (7)  | A  | Pr | Pr | A  | A  | Pr | A  | P      | -   | -  |
| 25 (8)  | A  | Pr | A  | A  | A  | A  | A  | R      | Pos | D  |
| 26 (9)  | A  | Pr | A  | A  | A  | A  | A  | R      | -   | -  |
| 27 (10) | A  | Pr | A  | Pr | A  | A  | A  | P      | -   | -  |
| 28 (10) | A  | Pr | A  | A  | A  | A  | A  | R      | -   | -  |
| 29 (11) | A  | Pr | Pr | A  | A  | A  | A  | P      | -   | -  |
| 30 (12) | A  | Pr | A  | Pr | A  | A  | A  | P      | Neg | P  |
| 31 (13) | A  | Pr | Pr | Pr | A  | Pr | A  | D      | -   | -  |
| 32 (14) | A  | Pr | Pr | A  | A  | A  | A  | P      | -   | -  |
| 33 (15) | A  | Pr | A  | Pr | A  | A  | A  | R      | -   | -  |
| 34 (16) | A  | Pr | Pr | A  | A  | A  | A  | P      | -   | -  |
| 35 (17) | A  | Pr | A  | Pr | A  | Pr | A  | P      | -   | -  |
| 36 (18) | A  | A  | A  | A  | A  | A  | A  | R      | -   | -  |
| 37 (19) | A  | Pr | Pr | A  | A  | A  | A  | P      | -   | -  |
| 38 (19) | A  | Pr | Pr | A  | A  | Pr | A  | P      | -   | -  |
| 39 (20) | A  | Pr | A  | -  | A  | A  | A  | R or P | -   | -  |
| 40 (21) | A  | Pr | A  | A  | A  | Pr | A  | P      | -   | -  |
| 41 (22) | A  | A  | Pr | A  | A  | A  | A  | R      | -   | -  |
| 42 (23) | A  | A  | A  | A  | A  | A  | A  | R      | -   | -  |
| 43 (23) | A  | Pr | A  | A  | A  | A  | A  | R      | -   | -  |
| 44 (23) | A  | Pr | A  | A  | A  | A  | A  | R      | -   | -  |
| 45 (23) | A  | Pr | A  | A  | A  | Pr | A  | P      | -   | -  |
| 46 (24) | A  | Pr | A  | Pr | A  | Pr | A  | P      | -   | -  |
| 47 (25) | A  | -  | -  | -  | A  | -  | -  | -      | -   | -  |
| 48 (26) | A  | Pr | Pr | A  | A  | A  | A  | P      | -   | -  |
| 49 (27) | NA | NA | NA | NA | NA | NA | NA | NA     | NA  | NA |

\*Ref, reference; A, absence of the criterion, Pr, presence of the criterion; \*, Only one patient among this series fulfilled the Duke criteria for the diagnosis of endocarditis before cardiac valve explantation; -, Not available or Not applicable; P, Possible; D, Definite; R, Rejected.

Technical Appendix Table 2. Proportion and geographic distribution of *Tropheryma whippelii* endocarditis from 702 French patients from the series of Fournier *et al.* (28) with blood culture negative endocarditis referred to our center for diagnostic purposes from May 2001 to September 2009\*

| French area                                       | Number of <i>T. whippelii</i> endocarditis (%) | Number of patients tested |
|---------------------------------------------------|------------------------------------------------|---------------------------|
| <b>Metropolitan France</b>                        |                                                |                           |
| Alsace                                            | 0                                              | 4                         |
| Aquitaine                                         | 0                                              | 11                        |
| Auvergne                                          | 0                                              | 7                         |
| Basse-Normandie                                   | 0                                              | 3                         |
| Bourgogne                                         | 0                                              | 2                         |
| Bretagne                                          | 0                                              | 9                         |
| Centre                                            | 0                                              | 47                        |
| Champagne-Ardennes                                | 0                                              | 3                         |
| Corse                                             | 0                                              | 2                         |
| Franche-Comté                                     | 0                                              | 6                         |
| Haute-Normandie                                   | 0                                              | 5                         |
| Île-de-France                                     | 0                                              | 92                        |
| Languedoc-Roussillon                              | 1 (7.1%)                                       | 14                        |
| Limousin                                          | -                                              | -                         |
| Lorraine                                          | 0                                              | 7                         |
| Midi-Pyrénées                                     | 0                                              | 18                        |
| Nord - Pas-de-Calais                              | 0                                              | 10                        |
| Pays de la Loire                                  | 4 (15.4%)                                      | 26                        |
| Picardie                                          | 1 (8.33%)                                      | 12                        |
| Poitou-Charentes                                  | 1 (2.6%)                                       | 38                        |
| Provence Alpes Côtes d'Azur (PACA)                | 0                                              | 269                       |
| Rhône-Alpes                                       | 9 (8.5%)                                       | 106                       |
| <b>French overseas administrative departments</b> |                                                |                           |
| Guadeloupe                                        | 0                                              | 1                         |
| Martinique                                        | -                                              | -                         |
| Guyane                                            | 0                                              | 7                         |
| Réunion                                           | 0                                              | 3                         |

\*Main significant differences are observed between Rhône-Alpes area and Centre, Île-de-France, and PACA areas ( $p = 0.03$ ,  $0.03$ , and  $<10^{-3}$ , respectively) and between Pays de la Loire area and Centre, Île-de-France, and PACA areas ( $p = 0.01$ ,  $0.001$ , and  $<10^{-3}$ , respectively).

Appendix Table 3. PCR and histological results for samples from 28 patients with *Tropheryma. whipplei* endocarditis\*

| Patient | Leukocytosis | Hypereosinophilia | Increasing CRP | Saliva sample | Stool sample | Blood sample | CSF  | Small-bowel biopsy <sup>1</sup> | Cardiac valve                    |
|---------|--------------|-------------------|----------------|---------------|--------------|--------------|------|---------------------------------|----------------------------------|
| 1       | Y            | Y                 | Y              | PCR-          | PCR-         | PCR-         | -    | -                               | PCR+/PAS+/IHC+/Cult+             |
| 2       | N            | N                 | Y              | PCR-          | -            | PCR-         | -    | -                               | PCR+/PAS+/IHC+/Cult+             |
| 3       | NA           | NA                | NA             | PCR-          | PCR+         | PCR+/Cult-   | PCR- | PAS-/IHC-/PCR-                  | PCR+/PAS+/IHC+/Cult-             |
| 4       | NA           | NA                | Y              | PCR-          | PCR-         | PCR-         | PCR- | PAS-/IHC-/PCR-                  | PCR+/PAS+/IHC+/Cult-             |
| 5       | Y            | NA                | Y              | -             | -            | -            | -    | PAS-/IHC-/PCR-                  | PCR+/PAS+/IHC+/Cult-             |
| 6       | N            | N                 | NA             | -             | -            | -            | -    | -                               | PCR+/PAS+/IHC+/Cult-             |
| 7       | NA           | NA                | NA             | PCR-          | PCR-         | PCR-         | -    | -                               | PCR+/Cult+                       |
| 8       | NA           | NA                | NA             | PCR-          | PCR-         | -            | PCR- | -                               | PCR+/Cult-                       |
| 9       | NA           | NA                | NA             | -             | -            | -            | -    | -                               | PCR+/PAS+/IHC+/Cult+             |
| 10      | NA           | NA                | NA             | -             | -            | -            | -    | PAS-/IHC-/PCR-                  | PCR+/PAS+/IHC+                   |
| 11      | NA           | NA                | NA             | -             | -            | -            | -    | PAS-/IHC-/PCR-                  | PCR+/PAS+/IHC+/Cult-             |
| 12      | N            | N                 | Y              | PCR-          | PCR-         | PCR+/Cult-   | -    | PAS-/IHC-/PCR-                  | PCR+/PAS+/IHC+/Cult <sup>2</sup> |
| 13      | N            | N                 | Y              | -             | -            | -            | -    | PAS-                            | PCR+                             |
| 14      | NA           | NA                | Y              | PCR-          | -            | PCR-/Cult-   | -    | PCR-/PAS-/IHC-                  | PCR+/Cult-                       |
| 15      | N            | N                 | Y              | PCR-          | PCR-         | PCR-         | PCR- | -                               | PCR+/PAS+/IHC+                   |
| 16      | Y            | N                 | Y              | PCR-          | PCR-         | PCR-         | PCR- | PAS-                            | PCR+/PAS+/IHC+                   |
| 17      | N            | NA                | Y              | PCR-          | PCR-         | PCR-         | PCR- | PAS-/IHC-                       | PCR+                             |
| 18      | NA           | NA                | N              | PCR-          | PCR-         | PCR-         | PCR- | PAS-/IHC-                       | PCR+/PAS+/IHC+/Cult+             |
| 19      | N            | N                 | Y              | PCR+          | PCR+         | PCR-         | -    | PAS-/IHC-/PCR+                  | PCR+/PAS+/IHC+/Cult-             |
| 20      | NA           | NA                | N              | PCR-          | PCR-         | PCR+/Cult+   | PCR- | PAS-/IHC-/PCR-                  | PCR+/Cult+                       |
| 21      | N            | N                 | Y              | -             | -            | PCR+/Cult-   | -    | PAS-/IHC-/PCR-                  | PCR+/PAS+/IHC+/Cult-             |
| 22      | N            | Y                 | Y              | PCR-          | -            | -            | -    | PAS-/IHC-/PCR-                  | PCR+/PAS+/IHC+/Cult-             |
| 23      | N            | NA                | N              | -             | -            | -            | -    | PAS-/IHC-/PCR-                  | PCR+/PAS+/IHC+/Cult-             |
| 24      | N            | N                 | Y              | -             | -            | PCR+/Cult+   | -    | PAS-/IHC-/PCR-                  | PCR+/PAS+/IHC+/Cult-             |
| 25      | Y            | NA                | Y              | -             | -            | PCR-/Cult-   | -    | PAS-/IHC-/PCR-                  | PCR+/PAS+/IHC+/Cult-             |
| 26      | NA           | NA                | N              | -             | -            | -            | -    | -                               | PAS+/IHC+/Cult+                  |
| 27      | Y            | NA                | Y              | -             | -            | -            | -    | -                               | PCR+/PAS+/IHC+                   |
| 28      | N            | NA                | Y              | -             | -            | -            | -    | PAS-/PCR-                       | PCR+/PAS+/IHC+                   |

\*Y, Yes; N, No; NA, Not available; -, Not Done; CRP, C-reactive protein; CSF, cerebrospinal fluid; PCR-, negative PCR; PCR+, positive PCR; Cult-, Culture negative; Cult+, Culture positive; PAS-, Negative PAS-staining; PAS+, Positive PAS-staining; IHC-, Specific immunohistochemistry negative; IHC+, Specific immunohistochemistry positive; <sup>1</sup>Including duodenum (19 patients), jejunum (8 patients), and ileum (7 patients); <sup>2</sup>A culture of *T. whipplei* has been obtained but the strain has not yet been established.

Technical Appendix Table 4. Characteristics of *Tropheryma whipplei* endocarditis in the literature review (negative PAS-staining duodeno-jejunal biopsy or, at least, without diarrhea)\*

| Patient (Ref) | Country     | Sex | Age, y | Cardiac history        | Presenting symptoms   | Arthralgia | Fever | SBB  | Involved valve | Veg° | Cardiac valve analysis | Antibiotic with duration when available                      | Outcome (follow-up duration when available) |
|---------------|-------------|-----|--------|------------------------|-----------------------|------------|-------|------|----------------|------|------------------------|--------------------------------------------------------------|---------------------------------------------|
| 1 (1)         | Germany     | M   | 69     | Ao regurgitation       | HF + stroke           | N          | N     | PAS- | Ao             | N    | PCR+/PAS+              | SXT 1 y                                                      | Well, death                                 |
| 2 (1)         | Germany     | M   | 76     | Ao bioprosthesis       | HF + stroke           | Y          | N     | -    | Ao             | N    | PCR+/PAS+/IHC+         | Cip, SXT 1 y                                                 | Lost                                        |
| 3 (1)         | Germany     | M   | 65     | NA                     | NA                    | N          | NA    | -    | Mi             | NA   | PCR+/PAS+/IHC+         | C 2 w, SXT 1 y                                               | Well (6 y)                                  |
| 4 (1)         | Germany     | F   | 60     | NA                     | NA                    | N          | NA    | -    | Ao             | NA   | PCR+/PAS+              | C 2 w, SXT 1 y                                               | Well (6 y)                                  |
| 5 (1)         | Germany     | M   | 69     | NA                     | NA                    | N          | NA    | -    | Ao             | NA   | PCR+                   | C 2 w, SXT 1 y                                               | Well, death                                 |
| 6 (1)         | Germany     | M   | 72     | NA                     | NA                    | N          | NA    | -    | Ao             | NA   | PCR+                   | None                                                         | Well (4 y)                                  |
| 7 (1,2)       | Germany     | F   | 77     | NA                     | NA                    | N          | NA    | -    | Ao             | NA   | PCR+/PAS+/IHC+         | None                                                         | Death                                       |
| 8 (1)         | Germany     | M   | 63     | NA                     | NA                    | N          | NA    | -    | Ao             | NA   | PCR+/PAS+/IHC+         | Various antibiotics                                          | Death                                       |
| 9 (1)         | Germany     | M   | 72     | NA                     | NA                    | N          | NA    | -    | Ao             | NA   | PCR+/PAS+/IHC+         | C 2 w, D 3 m, SXT 1 y                                        | Well (4 y)                                  |
| 10 (1)        | Germany     | M   | 46     | NA                     | NA                    | N          | NA    | -    | Ao             | NA   | PCR+                   | C 4 w                                                        | Well (3 y)                                  |
| 11 (1)        | Germany     | M   | 69     | NA                     | NA                    | N          | NA    | -    | Ao             | NA   | PCR+/PAS+/IHC+         | G 2 w, Blactams, SXT 1 y                                     | Death                                       |
| 12 (1)        | Germany     | F   | 57     | NA                     | NA                    | N          | NA    | -    | Mi             | NA   | PCR+/PAS+              | P, V, V+Fosfo 6 w before and after surgery                   | Well (4 y)                                  |
| 13 (1)        | Germany     | M   | 56     | NA                     | NA                    | N          | NA    | -    | Ao             | NA   | PCR+/PAS+/IHC+         | Before surgery: P+G 2 w, P 12 w<br>After surgery: V+P, P 6 w | Lost                                        |
| 14 (1)        | Germany     | M   | 59     | NA                     | NA                    | N          | NA    | -    | Ao             | NA   | PCR+                   | C 2 w, SXT 1 y                                               | Well (3 y)                                  |
| 15 (3)        | Canada      | M   | 48     | N                      | HF + stroke           | N          | NA    | -    | Ao             | Y    | PCR+/PAS+              | C +V 6 w, C +SXT 6 w, SXT 14 m                               | Well (14 m)                                 |
| 16 (4)        | UK          | M   | 66     | N                      | HF                    | Y          | N     | -    | Ao + Mi        | Y    | PCR+                   | Cip+Flucoxacillin+G, V+G+R, C 4 w SXT 12 m                   | Well                                        |
| 17 (5)        | France      | M   | 66     | Mi prolapsed           | HF                    | NA         | N     | -    | Mi             | Y    | PCR+/PAS+              | D+H 18 m                                                     | Well                                        |
| 18 (6)        | France      | M   | 72     | Ao+Mi Bioprostheses    | HF                    | NA         | N     | -    | Ao + Mi        | Y    | PCR+                   | C 2 w, SXT 1 y                                               | Well (4 y)                                  |
| 19 (6)        | France      | M   | 59     | Mi regurgitation       | HF                    | NA         | Y     | -    | Mi             | Y    | PCR +                  | C 2 w, SXT 1 y                                               | Well (1 y)                                  |
| 20 (6)        | France      | M   | 56     | N                      | HF                    | NA         | Y     | -    | Ao             | Y    | PCR+                   | C+G 2 w, SXT 1 y                                             | Well (5 m)                                  |
| 21 (7)        | Switzerland | M   | 54     | N                      | Peripheral embolism   | Y          | N     | -    | Ao             | Y    | PCR+/PAS+              | C+G 4 w, SXT 1 y                                             | Well (4 ½ y)                                |
| 22 (7)        | Switzerland | M   | 78     | Coronary heart disease | HF                    | N          | N     | -    | Ao             | Y    | PCR+/-                 | C+G 2 w, SXT 1 y                                             | Well (4 ½ y)                                |
| 23 (7)        | Switzerland | M   | 70     | N                      | HF                    | N          | N     | -    | Mi             | Y    | PCR+/PAS+              | C 2 w, SXT 1 y                                               | Well (2 y)                                  |
| 24 (7)        | Switzerland | M   | 76     | Heart insufficiency    | Stroke                | N          | N     | -    | Mi             | Y    | PCR+/PAS-              | C 2 w, SXT 1 y                                               | Well (2 y)                                  |
| 25 (8)        | Switzerland | M   | 50     | N                      | Weakness, weight loss | N          | N     | -    | Tri            | Y    | -                      | AmxClav, C, D+H+SXT                                          | Well (1 y)                                  |
| 26 (9)        | Spain       | F   | 57     | N                      | HF                    | Y          | N     | -    | Ao             | Y    | PCR+                   | C 1 w, SXT 18 m                                              | Well                                        |
| 27 (10)       | Denmark     | M   | 51     | N                      | HF                    | Y          | Y     | PAS- | Ao             | Y    | PCR+/PAS+              | Ongoing Amp+G+M 3 w, Cip+M+Dif 10 d, Mer+Cip+M+Dif 5 w,      | Death                                       |

| Patient (Ref) | Country        | Sex | Age, y | Cardiac history        | Presenting symptoms          | Arthralgia | Fever | SBB           | Involved valve | Veg° | Cardiac valve analysis | Antibiotic with duration when available | Outcome (follow-up duration when available) |
|---------------|----------------|-----|--------|------------------------|------------------------------|------------|-------|---------------|----------------|------|------------------------|-----------------------------------------|---------------------------------------------|
| 28 (10)       | Denmark        | M   | 67     | N                      | HF                           | Y          | N     | -             | Ao             | Y    | PCR+/PAS+              | SXT 1 w<br>P+G 4 w, SXT 1 y             | Well (9 m)                                  |
| 29 (11)       | UK             | M   | 38     | BAV                    | HF                           | Y          | N     | -             | Ao             | Y    | PCR+/PAS+              | NA                                      | NA                                          |
| 30 (12)       | Spain          | M   | 51     | N                      | HF                           | N          | Y     | -             | Ao             | Y    | PCR+/PAS+              | V+G, V+G+C, SXT 1 y                     | Well (1 y)                                  |
| 31 (13)       | Czech Republic | M   | 33     | BAV                    | Stroke + Peripheral embolism | Y          | Y     | PAS-          | Mi             | Y    | PCR+                   | V 3 w, Cip 6 w, C 3 w, T 6 m            | Well (6 m)                                  |
| 32 (14)       | UK             | M   | 58     | Cardiomyopathy         | HF                           | NA         | N     | PAS-          | Ao             | Y    | PCR+/PAS-              | Antibiotics                             | Death                                       |
| 33 (15)       | France         | M   | 61     | N                      | Weight loss                  | NA         | Y     | PAS-<br>/PCR+ | Ao             | Y    | -                      | Amx+G 3 w, SXT 13 m                     | Well (13 m)                                 |
| 34 (16)       | Germany        | F   | 80     | Ao bioprosthesis       | HF                           | NA         | N     | PAS-<br>/PCR- | Ao             | N    | PCR+                   | C 2 w, SXT 1 y                          | Well (1 y)                                  |
| 35 (17)       | Tunisia        | M   | 62     | N                      | Stroke + Peripheral embolism | NA         | Y     | PAS-<br>/PCR- | Ao             | Y    | PCR+                   | Amx+G, Cefto 3 w, SXT 1 y               | Well (2 ½ m)                                |
| 36 (18)       | Switzerland    | NA  | NA     | N                      | HF                           | Y          | N     | -             | Ao             | N    | PCR+                   | NA                                      | NA                                          |
| 37 (19)       | Canada         | M   | 65     | BAV                    | HF                           | N          | N     | -             | Ao             | Y    | PCR+                   | V, SXT 1 y                              | NA                                          |
| 38 (19)       | Canada         | M   | 51     | BAV                    | Peripheral embolism          | N          | N     | -             | Ao             | Y    | PCR+                   | V 4 w, SXT 1 y                          | NA                                          |
| 39 (20)       | Czech Republic | M   | 68     | Coronary heart disease | Valve dysfunction            | NA         | NA    | -             | Ao             | NA   | PCR+                   | NA                                      | NA                                          |
| 40 (21)       | Switzerland    | F   | 51     | N                      | Stroke                       | Y          | N     | PAS-<br>/PCR- | Mi             | Y    | PCR+/PAS-              | SXT 1 y                                 | Well (1 y)                                  |
| 41 (22)       | USA            | M   | 78     | Heart insufficiency    | HF                           | N          | N     | PAS-          | Ao             | N    | PCR+/PAS+              | V+G                                     | NA                                          |
| 42 (23)       | Switzerland    | M   | 64     | N                      | HF                           | Y          | N     | PAS-<br>/PCR- | Ao             | N    | PCR+                   | P+G 6 w, SXT 2 y                        | Well (36 m)                                 |
| 43 (23)       | Switzerland    | M   | 53     | N                      | HF                           | Y          | N     | PAS-<br>/PCR+ | Ao             | Y    | PCR+/PAS-              | C 6 w, SXT 1 y                          | Well (32 m)                                 |
| 44 (23)       | Switzerland    | M   | 55     | N                      | HF                           | Y          | N     | PAS-<br>/PCR- | Ao +Mi         | Y    | PCR +                  | SXT ongoing                             | Well (1 y)                                  |
| 45 (23)       | Switzerland    | F   | 55     | N                      | Stroke                       | Y          | N     | PAS-<br>/PCR- | Mi             | Y    | PCR+/PAS+              | C 6 w, SXT ongoing                      | Well (6 m)                                  |
| 46 (24)       | USA            | M   | 43     | N                      | HF + stroke                  | NA         | Y     | PAS-          | Ao +Mi         | Y    | PCR+/PAS+              | SXT ongoing                             | Well (7 m)                                  |
| 47 (25)       | Switzerland    | NA  | NA     | NA                     | NA                           | NA         | NA    | -             | Mi             | NA   | PCR+                   | NA                                      | NA                                          |
| 48 (26)       | UK             | M   | 50     | BAV                    | HF                           | Y          | N     | -             | Ao +Mi         | Y    | PCR+/PAS+              | C 2 w, SXT ongoing                      | Well (9 m)                                  |
| 49 (27)       | USA            | NA  | NA     | NA                     | NA                           | NA         | NA    | NA            | NA             | NA   | PCR MS+                | NA                                      | NA                                          |

\*Ref, Reference; SBB, Small-bowel biopsy; Veg°, Vegetation; BAV, Bicuspid Aortic Valve; -, Not done, NA, Not available; Y, yes; No, no Peripheral embolism, Peripheral arterial embolism; Stroke, Acute ischemic stroke; PCR MS, PCR electrospray ionization Mass spectrometry Amp, Ampicillin; Amx, Amoxicillin; AmxClav, Amoxicillin and Clavulanic acid; Cefto, Cefotaxime; Cip, Ciprofloxacin; D, Doxycycline; G, Gentamicin; H, Hydroxychloroquine; M, metronidazole; Mer, meropenem; P, Penicillin; R, Rifampicin; SXT, trimethoprim and sulfamethoxazole; y, year(s); m, month(s); w, week(s).

## References

1. Geissdörfer W, Moos V, Moter A, Loddenkemper C, Jansen A, Tandler R, et al. High frequency of *Tropheryma whipplei* in culture-negative endocarditis. *J Clin Microbiol*. 2012;50:216–22. [PubMed http://dx.doi.org/10.1128/JCM.05531-11](http://dx.doi.org/10.1128/JCM.05531-11)
2. Mallmann C, Siemoneit S, Schmiedel D, Petrich A, Gescher DM, Halle E, et al. Fluorescence in situ hybridization to improve the diagnosis of endocarditis: a pilot study. *Clin Microbiol Infect*. 2010;16:767–73. [PubMed http://dx.doi.org/10.1111/j.1469-0691.2009.02936.x](http://dx.doi.org/10.1111/j.1469-0691.2009.02936.x)
3. Chan V, Wang B, Veinot JP, Suh KN, Rose G, Desjardins M, et al. *Tropheryma whipplei* aortic valve endocarditis without systemic Whipple's disease. *Int J Infect Dis*. 2011;15:e804–6. [PubMed http://dx.doi.org/10.1016/j.ijid.2011.05.020](http://dx.doi.org/10.1016/j.ijid.2011.05.020)
4. Whistance RN, Elfarouki GW, Vohra HA, Livesey SA. A case of *Tropheryma whipplei* infective endocarditis of the aortic and mitral valves in association with psoriatic arthritis and lumbar discitis. *J Heart Valve Dis*. 2011;20:353–6. [PubMed http://dx.doi.org/10.1016/j.jhvd.2011.05.020](http://dx.doi.org/10.1016/j.jhvd.2011.05.020)
5. Brondex A, Jobic Y. Infective endocarditis as the only manifestation of Whipple's disease: an atypical presentation. *Ann Cardiol Angeiol (Paris)*. 2012;61:61–3. [PubMed http://dx.doi.org/10.1016/j.ancard.2010.12.005](http://dx.doi.org/10.1016/j.ancard.2010.12.005)
6. Besnard S, Cady A, Flecher E, Fily F, Revest M, Arvieux C, et al. Should we systematically perform central nervous system imaging in patients with Whipple's endocarditis? *Am J Med*. 2010;123:962.e–4. [PubMed http://dx.doi.org/10.1016/j.amjmed.2010.04.030](http://dx.doi.org/10.1016/j.amjmed.2010.04.030)
7. Escher R, Roth S, Droz S, Egli K, Altwegg M, Tauber MG. Endocarditis due to *Tropheryma whipplei*: rapid detection, limited genetic diversity, and long-term clinical outcome in a local experience. *Clin Microbiol Infect*. 2010;16:1213–22. [PubMed http://dx.doi.org/10.1111/j.1469-0691.2009.03038.x](http://dx.doi.org/10.1111/j.1469-0691.2009.03038.x)
8. Gabus V, Grenak-Degoumois Z, Jeanneret S, Rakotoarimanana R, Greub G, Genne D. *Tropheryma whipplei* tricuspid endocarditis: a case report and review of the literature. *J Med Case Rep*. 2010;4:245. [PubMed http://dx.doi.org/10.1186/1752-1947-4-245](http://dx.doi.org/10.1186/1752-1947-4-245)
9. Miguelena J, Munoz R, Maseda R, Epeldegui A. Endocarditis due to *Tropheryma whipplei*. *Rev Esp Cardiol*. 2010;63:250–1. [PubMed http://dx.doi.org/10.1016/S0300-8932\(10\)70052-X](http://dx.doi.org/10.1016/S0300-8932(10)70052-X)
10. Voldstedlund M, Pedersen LN, Baandrup U, Fuursted K. Whipple's disease—a cause of culture-negative endocarditis. *Ugeskr Laeger*. 2004;166:3731–2. [PubMed http://dx.doi.org/10.1016/j.ula.2004.08.010](http://dx.doi.org/10.1016/j.ula.2004.08.010)

11. Williams OM, Nightingale AK, Hartley J. Whipple's disease. *N Engl J Med*. 2007;356:1479–81. [PubMed http://dx.doi.org/10.1056/NEJMc070234](http://dx.doi.org/10.1056/NEJMc070234)
12. Marín M, Muñoz P, Sánchez M, del Rosal M, Alcalá L, Rodríguez-Crélixems M, et al. Molecular diagnosis of infective endocarditis by real-time broad-range polymerase chain reaction (PCR) and sequencing directly from heart valve tissue. *Medicine (Baltimore)*. 2007;86:195–202. [PubMed http://dx.doi.org/10.1097/MD.0b013e31811f44ec](http://dx.doi.org/10.1097/MD.0b013e31811f44ec)
13. Kolek M, Zaloudikova B, Freiburger T, Brat R. Aortic and mitral valve infective endocarditis caused by *Tropheryma whipplei* and with no gastrointestinal manifestations of Whipple's disease. *Klin Mikrobiol Infekc Lek*. 2007;13:213–6. [PubMed http://dx.doi.org/10.1185/1365311307015000](http://dx.doi.org/10.1185/1365311307015000)
14. West D, Hutcheon S, Kain R, Reid T, Walton S, Buchan K. Whipple's endocarditis. *J R Soc Med*. 2005;98:362–4. [PubMed http://dx.doi.org/10.1258/jrsm.98.8.362](http://dx.doi.org/10.1258/jrsm.98.8.362)
15. Saba M, Rollot F, Park S, Grimaldi D, Sicard D, Abad S, et al. Whipple disease, initially diagnosed as sarcoidosis. *Presse Med*. 2005;34:1521–4. [PubMed http://dx.doi.org/10.1016/S0755-4982\(05\)84217-4](http://dx.doi.org/10.1016/S0755-4982(05)84217-4)
16. Dreier J, Szabados F, von Herbay A, Kroger T, Kleesiek K. *Tropheryma whipplei* infection of an acellular porcine heart valve bioprosthesis in a patient who did not have intestinal Whipple's disease. *J Clin Microbiol*. 2004;42:4487–93. [PubMed http://dx.doi.org/10.1128/JCM.42.10.4487-4493.2004](http://dx.doi.org/10.1128/JCM.42.10.4487-4493.2004)
17. Marrakchi C, Abdennadher M, Blin D. Endocarditis caused by *Tropheryma whippelii*. *Tunis Med*. 2004;82:781–4. [PubMed http://dx.doi.org/10.1185/1365311304015000](http://dx.doi.org/10.1185/1365311304015000)
18. Bosshard PP, Kronenberg A, Zbinden R, Ruef C, Bottger EC, Altwegg M. Etiologic diagnosis of infective endocarditis by broad-range polymerase chain reaction: a 3-year experience. *Clin Infect Dis*. 2003;37:167–72. [PubMed http://dx.doi.org/10.1086/375592](http://dx.doi.org/10.1086/375592)
19. Richardson DC, Burrows LL, Korithoski B, Salit IE, Butany J, David TE, et al. *Tropheryma whippelii* as a cause of afebrile culture-negative endocarditis: the evolving spectrum of Whipple's disease. *J Infect*. 2003;47:170–3. [PubMed http://dx.doi.org/10.1016/S0163-4453\(03\)00015-X](http://dx.doi.org/10.1016/S0163-4453(03)00015-X)
20. Grijalva M, Horvath R, Dendis M, Emy J, Benedik J. Molecular diagnosis of culture negative infective endocarditis: clinical validation in a group of surgically treated patients. *Heart*. 2003;89:263–8. [PubMed http://dx.doi.org/10.1136/heart.89.3.263](http://dx.doi.org/10.1136/heart.89.3.263)
21. Naegeli B, Bannwart F, Bertel O. An uncommon cause of recurrent strokes: *Tropheryma whippelii* endocarditis. *Stroke*. 2000;31:2002–3. [PubMed http://dx.doi.org/10.1161/01.STR.31.8.2002](http://dx.doi.org/10.1161/01.STR.31.8.2002)

22. Smith MA. Whipple endocarditis without gastrointestinal disease. *Ann Intern Med.* 2000;132:595. [PubMed http://dx.doi.org/10.7326/0003-4819-132-7-200004040-00025](http://dx.doi.org/10.7326/0003-4819-132-7-200004040-00025)
23. Gubler JG, Kuster M, Dutly F, Bannwart F, Krause M, Vögelin HP, et al. Whipple endocarditis without overt gastrointestinal disease: report of four cases. *Ann Intern Med.* 1999;131:112–6. [PubMed http://dx.doi.org/10.7326/0003-4819-131-2-199907200-00007](http://dx.doi.org/10.7326/0003-4819-131-2-199907200-00007)
24. Elkins C, Shuman T, Pirolo J. Cardiac Whipple's disease without digestive symptoms. *Ann Thorac Surg.* 1999;67:250–1. [PubMed http://dx.doi.org/10.1016/S0003-4975\(98\)01204-1](http://dx.doi.org/10.1016/S0003-4975(98)01204-1)
25. Goldenberger D, Kunzli A, Vogt P, Zbinden R, Altwegg M. Molecular diagnosis of bacterial endocarditis by broad-range PCR amplification and direct sequencing. *J Clin Microbiol.* 1997;35:2733–9. [PubMed](http://dx.doi.org/10.1093/icvts/ivs116)
26. Love SM, Morrison L, Appleby C, Modi P. *Tropheryma whipplei* endocarditis without gastrointestinal involvement. *Interact Cardiovasc Thorac Surg.* 2012;15:161–3. [PubMed http://dx.doi.org/10.1093/icvts/ivs116](http://dx.doi.org/10.1093/icvts/ivs116)
27. Brinkman CL, Vergidis P, Uhl JR, Pritt BS, Cockerill FR, Steckelberg JM, et al. Polymerase chain reaction-electrospray ionization mass spectrometry for direct detection of pathogens and antimicrobial resistance from heart valves in patients with infective endocarditis. *J Clin Microbiol.* 2013; Epub ahead of print. [PubMed http://dx.doi.org/10.1128/JCM.00304-13](http://dx.doi.org/10.1128/JCM.00304-13)
28. Fournier PE, Thuny F, Richet H, Lepidi H, Casalta JP, Arzouni JP, et al. Comprehensive diagnostic strategy for blood culture–negative endocarditis: a prospective study of 819 new cases. *Clin Infect Dis.* 2010;51:131–40. [PubMed http://dx.doi.org/10.1086/653675](http://dx.doi.org/10.1086/653675)
